# Supplementary material for: Comparison of Fatigue Properties and Fatigue Crack Growth Rates of Various Implantable Metals
Source: Materials (Basel). 2012 Dec 19;5(12):2981–3005. doi: 10.3390/ma5122981 (PMC5449063; doi:10.3390/ma5122981)
Supplement: Supplementary File 1 [file materials-05-02981-s001.pdf]

# Comparison of Fatigue Properties and Fatigue Crack Growth Rates of Various Implantable Metals

Yoshimitsu Okazaki

Advanced Biomaterials Group, Human Technology Research Institute, National Institute of Advanced Industrial Science and Technology, 1-1-1 Higashi, Tsukuba-shi, Ibaraki 305-8566, Japan

Due to an oversight by the author, in the research article [1] the legends of Figures 15, 16 and 17 on pages 2998 and 2999 indicating the type of metals used for the experiments were missing. Below are the complete figures.

**Figure 15.** Effects of cutting direction on fatigue crack growth rate obtained by fatigue crack test of annealed and aged Ti-15Zr-4Nb-4Ta alloys in air.

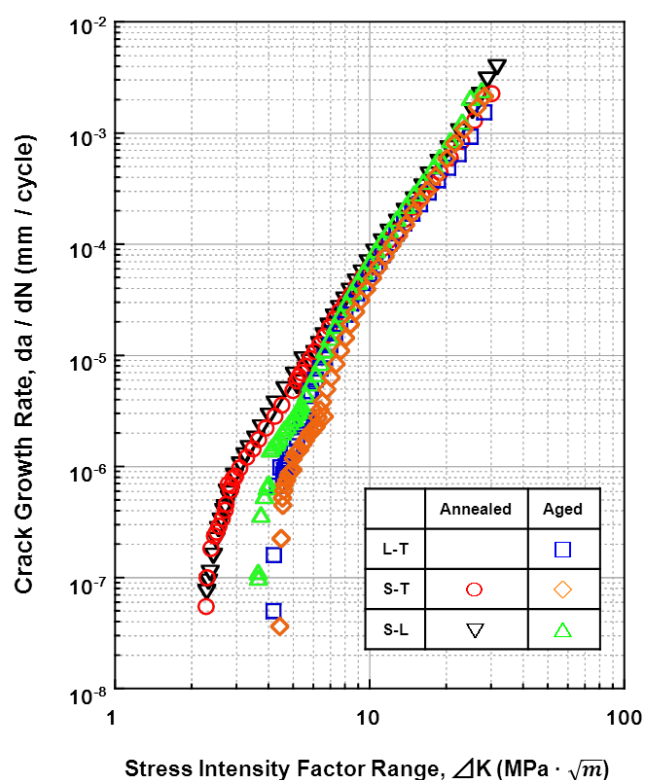

**Figure 16.** Effects of heat treatment on fatigue crack growth rate obtained by fatigue crack growth test of  $\beta$ -annealed and  $\alpha$ - $\beta$ -forged Ti-15Zr-4Nb-4Ta alloys in air.

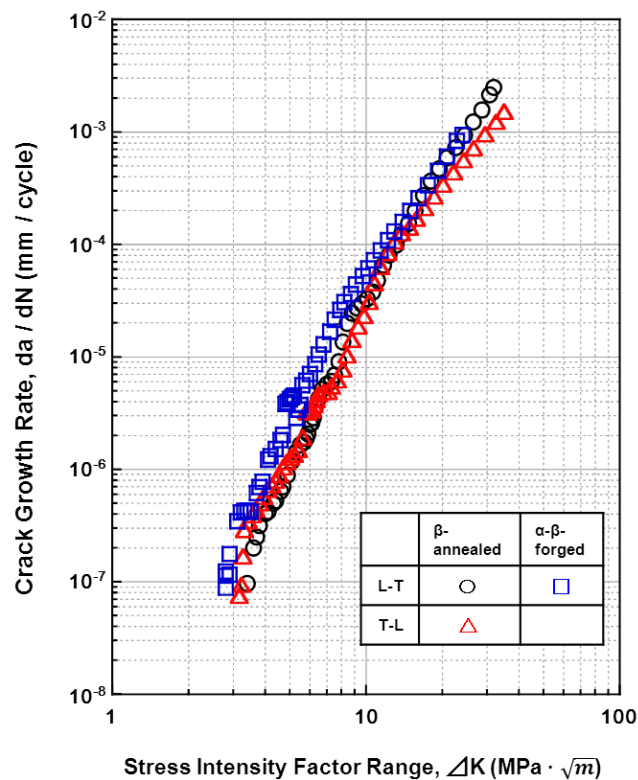

**Figure 17.** Effect of 0.9% NaCl on fatigue crack growth rate obtained by fatigue crack test of annealed Ti-15Zr-4Nb-4Ta alloy.

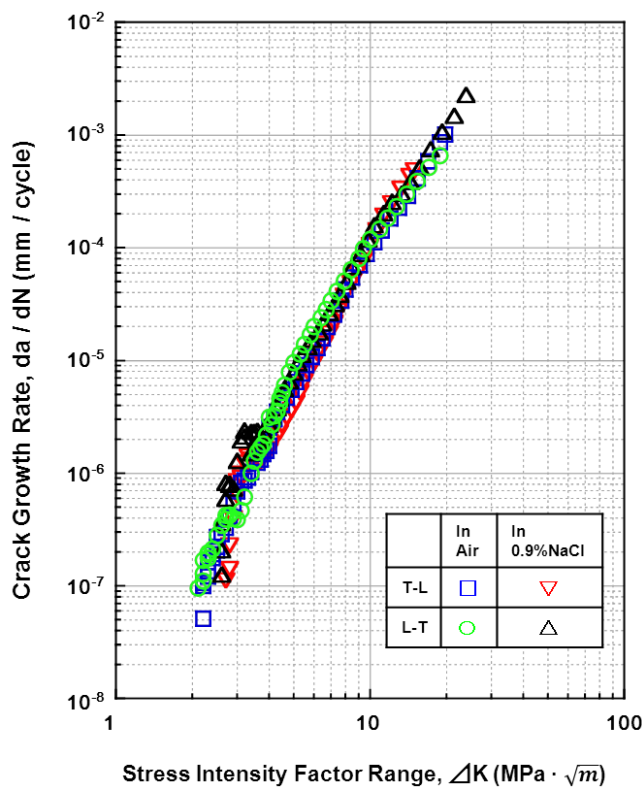

We apologize for any inconvenience this may have caused.

## **References**

1. Okazaki, Y. Comparison of Fatigue Properties and Fatigue Crack Growth Rates of Various Implantable Metals. *Materials* **2012**, *5*, 2981-3005.

© 2013 by the authors; licensee MDPI, Basel, Switzerland. This article is an open access article distributed under the terms and conditions of the Creative Commons Attribution license (<http://creativecommons.org/licenses/by/3.0/>).
